# Supplementary material for: Prediction of Glucose Metabolism Disorder Risk Using a Machine Learning Algorithm: Pilot Study
Source: PubMed Central journal article supplement (PMC6288596; doi:10.2196/10212), 2018-11-26
Supplement: diabetes_v3i4e10212_app1.pdf [file diabetes_v3i4e10212_app1.pdf]

# 1 Appendix A

2

3 In this appendix, GTB algorithm is briefly reviewed according to Chen and  
4 Guestrin [16]. Let  $x \in \mathbb{R}^m$  be  $m$  dimensional input variables,  $y \in \mathbb{R}$  be an  
5 output variable, and  $D = \{(x_i, y_i)_{i=1}^n | x_i \in \mathbb{R}^m, y_i \in \mathbb{R}\}$  be  $n$  number of data. A  
6 regression tree  $f(x)$  having  $T$  leaves and leaf weight vector  $w \in \mathbb{R}^T$  is defined as

$$7 \quad f(x) = w_{q(x)},$$
$$8 \quad q: \mathbb{R}^m \rightarrow \{1, \dots, T\}, w \in \mathbb{R}^T,$$

9 where  $q$  is a function that maps input variables  $x \in \mathbb{R}^m$  to leaf index  $i \in$   
10  $\{1, \dots, T\}$ . The function  $q$  specifies the tree structure of a regression tree.  $w \in \mathbb{R}^T$   
11 specifies the leaf weights of the regression tree. Let  $\mathcal{F}$  be the whole set of the  
12 regression trees having  $T$  leaves.

13 In ensemble learning such as Bagging and Boosting, outcome  $y$  is predicted  
14 using an ensemble  $\phi(x)$  of  $K$  number of weak-learners  $\{f_k(x)\}$  :

$$15 \quad \hat{y}_i = \phi(x_i) = \sum_{k=1}^K f_k(x_i), f_k \in \mathcal{F}$$

16 For each regression tree  $f_k(x)$ , we need to learn tree structure  $q$  and leaf weights  
17  $w \in \mathbb{R}^T$  from training data. Tree structure  $q$  and leaf weights  $w \in \mathbb{R}^T$  are  
18 learned by minimizing the following regularized objective function:

$$19 \quad L(\phi) = \sum_{i=1}^n l(y_i, \hat{y}_i) + \sum_{k=1}^K \Omega(f_k),$$
$$20 \quad \Omega(f) = \gamma T + \frac{1}{2} \lambda \|w\|^2,$$

21 Here  $l$  is a differentiable convex function that measures difference between  
22 predicted values  $\hat{y}_i$  and the true value  $y_i$  (fitting loss).  $\Omega(f)$  is a  
23 regularization term introduced in order to prevent over-fitting. The penalty term  
24  $\gamma T$  is added so that leaf number  $T$  is small and resulting regression tree  $f_k(x)$  is

25 simple. The penalty term  $\frac{1}{2} \lambda \|w\|^2$  is added so that  $l_2$ -norm of the leaf weights  $w$   
26 is small.  $\gamma, \lambda$  are hyperparameters of the XGBoost.

27 In the Gradient Boosting, a weak-learner  $f_k$  is trained in additive manner. Let  
28  $\hat{y}_i^{(t)}$  be the predicted value for the  $i$ -th data at iteration step  $t$ . Using a new  
29 function  $f_t$ , objective function  $L(\phi)$  is rewritten as follows:

1 
$$L^{(t)}(f_t) = \sum_{i=1}^n l(y_i, \hat{y}_i^{(t-1)} + f_t(x_i)) + \Omega(f_t).$$

2 Given  $\hat{y}_i^{(t-1)}$ , regression tree  $f_t$  is greedily optimized to minimize the objective  
 3 function  $L^{(t)}(f_t)$ . XGBoost exploits the second order approximation of  $L^{(t)}(f_t)$   
 4 using Taylor expansion, i.e.,

5 
$$L^{(t)}(f_t) \approx \sum_{i=1}^n \left[ l(y_i, \hat{y}_i^{(t-1)}) + g_i f_t(x_i) + \frac{1}{2} h_i f_t^2(x_i) \right] + \Omega(f_t).$$

6 Here  $g_i = \partial_{\hat{y}_i^{(t-1)}} l(y_i, \hat{y}_i^{(t-1)})$  and  $h_i = \partial_{\hat{y}_i^{(t-1)}}^2 l(y_i, \hat{y}_i^{(t-1)})$  are gradient and  
 7 hessian statistics computed from first and second order derivatives of the loss  
 8 function  $l$ , respectively.

9 Objective function  $L^{(t)}(f_t)$  as a function of  $f_t$  is simplified as

10 
$$\tilde{L}^{(t)} = \sum_{i=1}^n \left[ g_i f_t(x_i) + \frac{1}{2} h_i f_t^2(x_i) \right] + \gamma T + \frac{1}{2} \lambda \|w\|^2.$$

11 For each leaf  $j \in \{1, \dots, T\}$  of a regression tree  $f_t$  with a tree structure  $q$ , we  
 12 define an index set  $I_j = \{i | q(x_i) = j\}$ . We define  $G_j = \sum_{i \in I_j} g_i$ ,  $H_j = \sum_{i \in I_j} h_i$ .

13 Objective function  $\tilde{L}^{(t)}$  is rewritten as

17 
$$\tilde{L}^{(t)} = \sum_{j=1}^T \left[ G_j w_j + \frac{1}{2} (H_j + \lambda) w_j^2 \right] + \gamma T.$$

14 Note that the summation is only taken through leaves  $j \in \{1, \dots, T\}$  and not  
 15 through data. Since the objective function  $\tilde{L}^{(t)}$  is quadratic with respect to leaf  
 16 weight vector  $w$ , the optimal leaf weights can be solved as

18 
$$w_j^* = -\frac{G_j}{H_j + \lambda} \quad j \in \{1, \dots, T\}.$$

19 By substituting the optimal weight vector  $w^*$  into the objective function  $\tilde{L}^{(t)}$ , we  
 20 obtain

21 
$$\tilde{L}^{(t)}(q) = -\frac{1}{2} \sum_{j=1}^T \frac{G_j^2}{H_j + \lambda} + \gamma T$$

22 Note that once a tree structure  $q$  of a regression tree  $f_t$  is given, the optimal  
 23 weight vector  $w^*$  and  $\tilde{L}^{(t)}(q)$  are computed. Objective function  $\tilde{L}^{(t)}(q)$  is used  
 24 as a score of the tree structure  $q$ .

25 It is computationally severe to enumerate all candidates of tree structures  $q$ . To

1 obtain an efficient and approximate algorithm, a greedily optimal splitting of a leaf  
2 node is explored using the score function  $\tilde{L}^{(t)}(q)$ . Let  $q_B$  be a tree structure before  
3 splitting of a leaf node and  $q_A$  be a tree structure after splitting of the leaf node.  
4 Then the gain of the splitting is measured by a score:

5 
$$L_{split} = \tilde{L}^{(t)}(q_B) - \tilde{L}^{(t)}(q_A).$$

6 A greedily optimal splitting is determined by that maximizing the gain. A greedily  
7 optimal tree structure  $q^*$  is explored by repeating the above procedure. XGBoost  
8 is elaborated on speeding up the above algorithm and increasing the scalability,  
9 with taking into account sparsity-aware algorithm, out-of-core computing, and  
10 parallel computing. See Chen and Guestrin [16] for technical details.
